# Supplementary material for: Evaluation of a community health worker intervention and the World Health Organization’s Option B versus Option A to improve antenatal care and PMTCT outcomes in Dar es Salaam, Tanzania: study protocol for a cluster-randomized controlled health systems implementation trial
Source: PubMed Central journal article supplement (PMC4247663; doi:10.1186/1745-6215-15-359), 2014-09-15

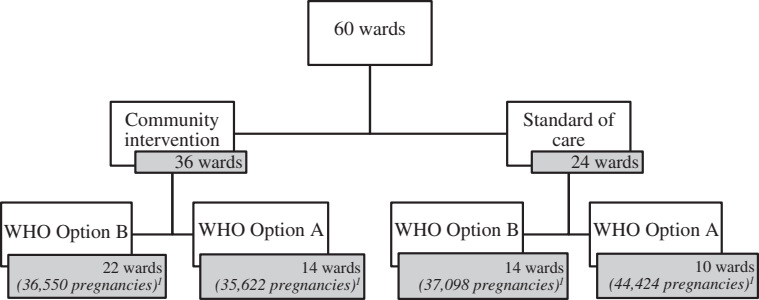

Supplement: 13063_2013_2319_MOESM4_ESM.pdf [file 13063_2013_2319_MOESM4_ESM.pdf]
